# Supplementary material for: Preventing bacterial adhesion to skin by altering their physicochemical cell surface properties specifically
Source: PubMed Central journal article supplement — NPJ Biofilms Microbiomes. 2024 Sep 30;10:94. doi: 10.1038/s41522-024-00568-8 (PMC11442763; doi:10.1038/s41522-024-00568-8), 2024-09-30
Supplement: 41522_2024_568_MOESM1_ESM.pdf [file 41522_2024_568_MOESM1_ESM.pdf]

# **Supplementary Tables and Figures**

**Preventing bacterial adhesion to skin by altering their physicochemical cell surface properties specifically.**

Xavier JANVIER<sup>1</sup>, Severine JANSEN<sup>1#</sup>, Charleyne PRENOM<sup>1#</sup>, Nabiha KHODABUX<sup>1</sup>, Francesca ZUTTON<sup>2</sup>, Cécile DUCLAIROIR-POC<sup>3#</sup>, Sylvie CUPFERMAN<sup>1#</sup>, Ahmad KHODR<sup>1\*</sup>

<sup>1</sup>International Microbiology Department, L'Oréal Research & Innovation, Chevilly-Larue, France

<sup>2</sup>Advanced Research, L'Oréal Research & Innovation, Aulnay-sous-Bois, France

<sup>3</sup>Bacterial Communication and Anti-infectious Strategies (CBSA), UR4312, Rouen-Normandy University, Evreux, France

#Equivalent contribution

\*Corresponding author

E-mail : [ahmad.khodr@loreal.com](mailto:ahmad.khodr@loreal.com) (AK)

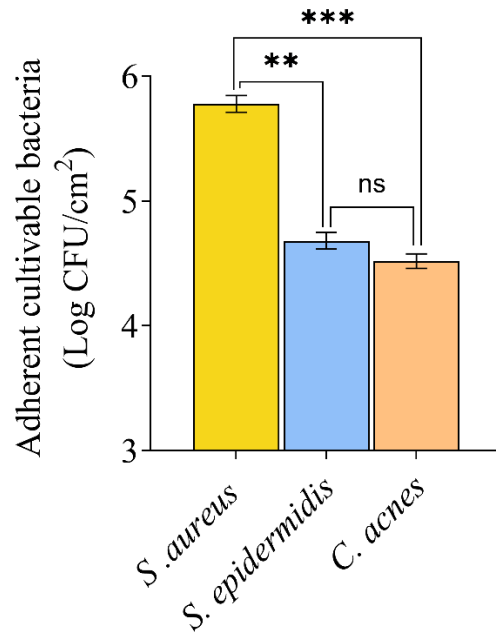

**Supplementary Figure 1: Native adhesion of wild-type skin bacteria after 2 h of incubation on the 3D skin model.**

Results are expressed in *Log*<sub>10</sub> of the number of bacteria adhered per cm<sup>2</sup> of reconstructed skin of the 3D skin model. Error bars show standard error of the mean (SEM) of independent treatments (n > 3). 3 wild-type *S. aureus* strains and *C. acnes* strains and 2 wild-type *S. epidermidis* strains. Strains used are from clinical origins. Statistical significance was calculated by a multiple comparison of strains using the Tukey's test following one-way ANOVA. (\*) for p < 0.05, (\*\*) for p < 0.01 and (\*\*\*).

**Supplementary Table 1: wild-type strains used in Supplementary Figure 1**

| Bacteria                          | Id. Strain          | Origin                  | Ref.                                        |
|-----------------------------------|---------------------|-------------------------|---------------------------------------------|
| <i>Staphylococcus aureus</i>      | AD08 <sub>cc1</sub> | Human Atopic dermatitis | Fleury <i>et al</i> , 2017 <sup>1</sup>     |
|                                   | BC1406              | Human Atopic dermatitis | This Study                                  |
|                                   | BC1407              | Human Atopic dermatitis | This Study                                  |
| <i>Staphylococcus epidermidis</i> | BC1190              | Human normal skin       | Landemaine <i>et al</i> , 2023 <sup>2</sup> |
|                                   | 45A6                | Human Atopic dermatitis | Landemaine <i>et al</i> , 2023 <sup>2</sup> |
| <i>Cutibacterium acnes</i>        | BC1089              | Human normal skin       | This Study                                  |
|                                   | BC1083              | Human oily skin         | This Study                                  |
|                                   | BC1077              | Human normal skin       | This Study                                  |

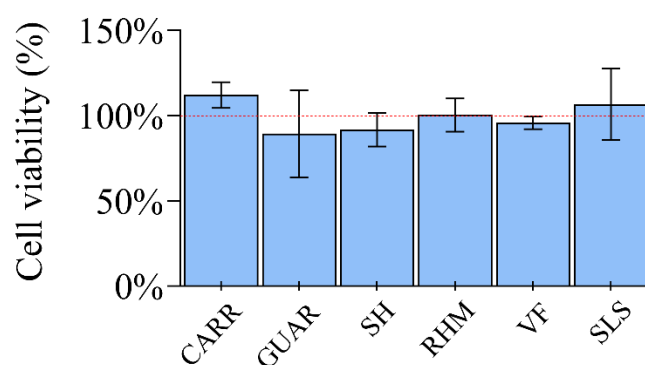

**Supplementary Figure 2: Preservation of 3d skin cell viability after topical compound exposure**

MTT assay demonstrating the maintenance of 3D skin model viability following a 2-hour topical treatment of 3D skin cell to the tested compounds. Results are expressed as percentage of viability relative to the water-treated control. SLS : Sodium Laureth Sulfate ; CARR: Carrageenan ; GUAR: Guar Hydroxypropyltrimonium Chloride ; SH: Sodium Hyaluronate ; RHM: Rhamnolipids ; VF : *Vitreoscilla filiformis* extract. Error bars represent standard deviation (SD) of two independent experiments ( $n \geq 2$ ).

**Supplementary Table 2: Contact angle measurement after application of tested compounds using the 3D skin model epidermal surface.**

|                      | Water      | Cosmetic raw materials |            |            |            |            |         |
|----------------------|------------|------------------------|------------|------------|------------|------------|---------|
|                      |            | CARR                   | GUAR       | SH         | RHM        | VF         | SLS     |
| <b>Angle contact</b> | 34.6 ± 5.9 | 24.4 ± 2.6             | 10.4 ± 1.4 | 19.8 ± 5.7 | 31.5 ± 1.3 | 26.1 ± 1.2 | 8 ± 0.0 |

\* Angle contacts are expressed in degrees. Values are defined from at least three independent experiments ± standard error of the mean (SEM).

a)

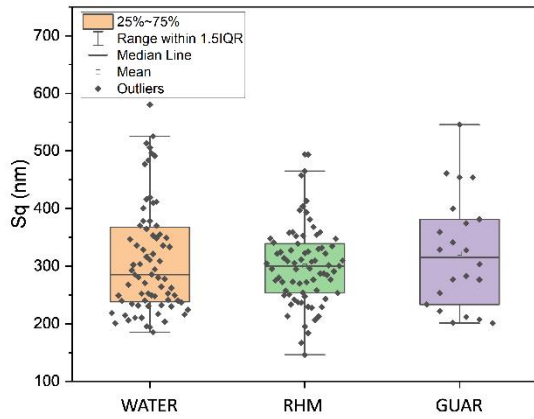

b)

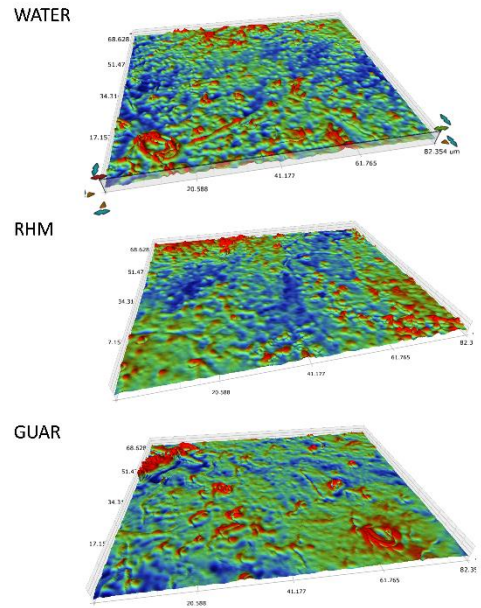

**Supplementary Figure 3: Roughness characterization of the treated 3D skin model using optical profilometry.**

**a)** Box plots representing  $S_q$  (root mean square height) values obtained from optical profilometry measurements. Each data point represents a single profilometry image. **b)** Representative profilometry images ( $80 \times 69 \mu\text{m}^2$ ) for each condition. GUAR: Guar Hydroxypropyltrimonium Chloride ; RHM: Rhamnolipids. Error bars represent standard deviation (SD) of a minimum of 22 images per condition, with three biological replicates for RHM and water controls and two biological replicates for GUAR.

**Supplementary Table 3: Surface polarity and Lewis-acid balance of treated skin bacteria with tested compounds.**

| Bacteria         | Physicochemical parameters* | Compounds tested |             |             |            |            |            |
|------------------|-----------------------------|------------------|-------------|-------------|------------|------------|------------|
|                  |                             | CARR             | GUAR        | SH          | RHM        | VF         | SLS        |
| <i>S. aureus</i> | Hydrophobic (%)             | 86.3 ± 3.0       | 70.2 ± 6.4  | 95.2 ± 1.1  | 0.0 ± 0.0  | 65.1 ± 3.1 | 28.1 ± 1.5 |
|                  | Lewis acid $\gamma^+$       | 23.4 ± 4.0       | 3.6 ± 1.6   | 10.0 ± 2.4  | 39.0 ± 1.1 | 8.5 ± 3.0  | 41.6 ± 7.3 |
|                  | Lewis base $\gamma^-$       | 12.1 ± 4.3       | 14.9 ± 4.2  | 3.5 ± 1.2   | 0.1 ± 0.1  | 5.2 ± 1.1  | 10.2 ± 3.9 |
| <i>C. acnes</i>  | Hydrophobic (%)             | 55.6 ± 11.7      | 65.0 ± 10.9 | 71.2 ± 10.7 | 4.0 ± 1.2  | 33.0 ± 4.6 | 0.0 ± 0.0  |
|                  | Lewis acid $\gamma^+$       | 18.1 ± 3.1       | 13.5 ± 0.2  | 8.8 ± 1.5   | 32.1 ± 3.8 | 6.8 ± 0.9  | 20.2 ± 1.3 |
|                  | Lewis base $\gamma^-$       | 18.5 ± 4.3       | 16.2 ± 3.1  | 9.0 ± 1.0   | 10.5 ± 2.7 | 19.3 ± 1.0 | 3.0 ± 1.3  |

\*Parameters are expressed in percent for hydrophobicity and in arbitrary units for Lewis acid/base. Values are defined from at least three independent MATS experiments ± standard error of the mean (SEM).

**Supplementary Table 4. Differential RNA expression analysis ( $\geq 1.5$ -fold ;  $p_{adj} < 0.1$ ) of *S. aureus* between compounds-treated conditions and water-treated condition.**

| Locus tag      | Description                                                                                                | log2FoldChange |       |    |      |    |
|----------------|------------------------------------------------------------------------------------------------------------|----------------|-------|----|------|----|
|                |                                                                                                            | CARR           | GUAR  | SH | RHM  | VF |
| SAOUHSC_00198  | AMP-dependent synthetase and ligase                                                                        |                |       |    | 1.70 |    |
| SAOUHSC_00199  | Hypothetical unknow protein belongs to the 3-oxoacid CoA-transferase family                                |                |       |    | 1.84 |    |
| SAOUHSC_00420  | Hypothetical unknow protein belongs to the sodium neurotransmitter symporter (SNF) (TC 2.A.22) family      |                |       |    | 1.59 |    |
| SAOUHSC_00465  | Biofilm formation stimulator VEG                                                                           | -2.25          |       |    |      |    |
| SAOUHSC_00767  | Ribosomal S30AE domain containing protein                                                                  | -1.71          |       |    |      |    |
| SAOUHSC_00786  | Hypothetical unknow protein                                                                                |                | -1.96 |    |      |    |
| SAOUHSC_00914  | pyruvate carboxyltransferase                                                                               |                | 1.52  |    |      |    |
| SAOUHSC_00975  | DoxX family transmembrane protein                                                                          | -2.21          |       |    |      |    |
| SAOUHSC_01036  | Hypothetical unknow protein belongs to the UPF0356 family                                                  |                | -1.70 |    |      |    |
| SAOUHSC_01144  | Cell division protein                                                                                      | -1.53          |       |    |      |    |
| SAOUHSC_01349  | Hypothetical unknow protein belongs to the HesB/IscA family iron-sulfur cluster assembly accessory protein | -1.56          |       |    |      |    |
| SAOUHSC_01704  | Hypothetical unknow protein                                                                                | -1.66          |       |    |      |    |
| SAOUHSC_01764  | peptidase A24A, prepilin type IV                                                                           | -1.67          |       |    |      |    |
| SAOUHSC_01782  | MutT/nudix hydrolases                                                                                      |                | -1.56 |    |      |    |
| SAOUHSC_01902  | Hypothetical unknow protein                                                                                | -1.68          |       |    |      |    |
| SAOUHSC_02118  | gatC – glutamyl-tRNA(Gln) amidotransferase, C subunit                                                      | -1.56          | -1.53 |    |      |    |
| SAOUHSC_02176  | Hypothetical unknow protein                                                                                |                | -1.90 |    |      |    |
| SAOUHSC_02286  | leuB – 3-isopropylmalate dehydrogenase                                                                     |                |       |    | 1.60 |    |
| SAOUHSC_02288  | leuD – 3-isopropylmalate dehydratase, small subunit                                                        |                |       |    | 1.64 |    |
| SAOUHSC_02320  | Hypothetical unknow protein                                                                                |                | 3.15  |    |      |    |
| SAOUHSC_02523  | Hypothetical unknow protein                                                                                | -1.64          |       |    |      |    |
| SAOUHSC_02853  | Hypothetical unknow protein belongs to the UPF0346 family                                                  | -2.09          |       |    |      |    |
| SAOUHSC_03017  | N-acetyltransferase                                                                                        |                | -2.24 |    |      |    |
| SAOUHSC_03045  | Cold shock protein                                                                                         |                |       |    | 1.82 |    |
| SAOUHSC_T00012 | tRNAasp                                                                                                    |                | -2.98 |    |      |    |

## Supplementary References

- 1 Fleury, O. M. *et al.* Clumping Factor B Promotes Adherence of *Staphylococcus aureus* to Corneocytes in Atopic Dermatitis. *Infect Immun* **85** (2017). <https://doi.org/10.1128/iai.00994-16>
- 2 Landemaine, L. *et al.* *Staphylococcus epidermidis* isolates from atopic or healthy skin have opposite effect on skin cells: potential implication of the AHR pathway modulation. *Frontiers in Immunology* **14** (2023). <https://doi.org/10.3389/fimmu.2023.1098160>
